# Supplementary material for: Inhibition of Gata4 and Tbx5 by Nicotine-Mediated DNA Methylation in Myocardial Differentiation
Source: PubMed Central journal article supplement — Stem Cell Reports. 2017 Jan 19;8(2):290–304. doi: 10.1016/j.stemcr.2016.12.016 (PMC5312513; doi:10.1016/j.stemcr.2016.12.016), 2017-01-19
Supplement: mmc1.pdf [file mmc1.pdf]

**Stem Cell Reports, Volume 8**

**Supplemental Information**

**Inhibition of *Gata4* and *Tbx5* by Nicotine-Mediated DNA Methylation in Myocardial Differentiation**

**Xue-Yan Jiang, Yu-Liang Feng, Li-Tong Ye, Xiao-Hong Li, Juan Feng, Meng-Zhen Zhang, Harnath S. Shelat, Michael Wassler, Yangxin Li, Yong-Jian Geng, and Xi-Yong Yu**

## Supplemental Figures and Legends

### Figure S1. Effect of nicotine on embryonic body formation and cell viability (Related to Figure 1).

To test the effect of nicotine on cardiac differentiation, embryonic bodies (EBs) developed from mESCs were treated with a serial dosage of nicotine from 0.01-10  $\mu\text{M}$  during hanging drop culture and differentiation. EB formation and cell viability were analyzed. The results showed that nicotine has no effect on either EB formation or cell viability. Instead, MTT assay revealed that 10  $\mu\text{M}$  nicotine treatment slightly increased cell numbers at day 3.

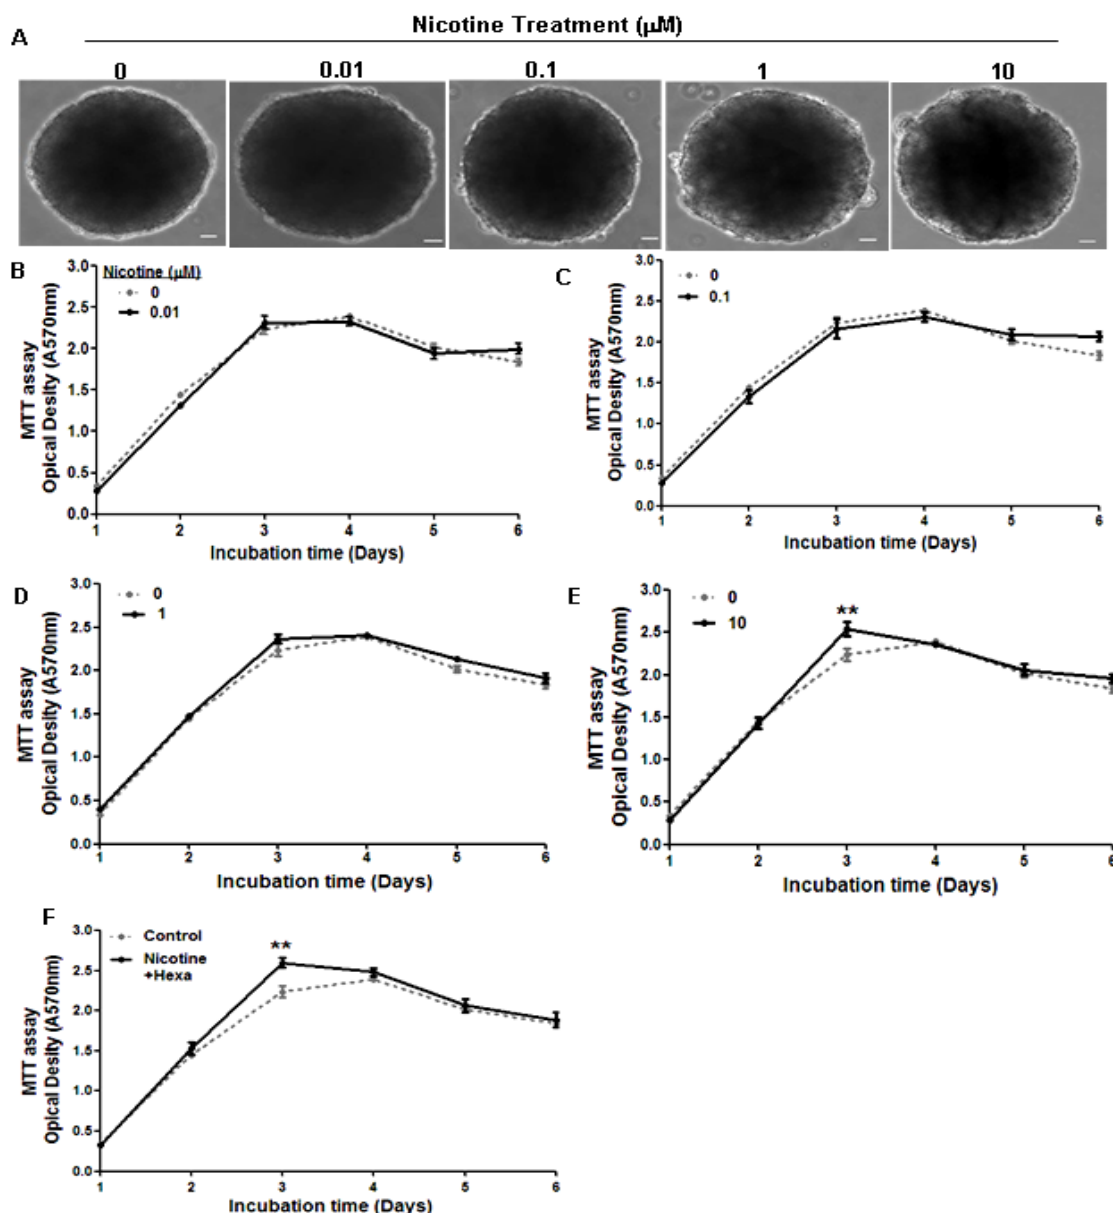

**Figure S1. Effect of nicotine on embryonic body formation and cell viability.**

(A) Morphology of EBs derived from mESCs was obtained directly after 4-day hanging drop culture with 0.01-10  $\mu\text{M}$  nicotine. Scale bar represents 100  $\mu\text{m}$ . mESCs were incubated for 6-days in differentiation medium with 0.01-10  $\mu\text{M}$  nicotine alone (B-E) or in 10  $\mu\text{M}$  nicotine combined with 10  $\mu\text{M}$  Hexa (F). (B-F) MTT assays were performed for cell viability. Data represent the means $\pm$ SEM of three independent experiments. \*\* $P < 0.01$ .

**Figure S2. nAChRs subtypes expressed in mESCs and mouse heart (Related to Figure 1).**

RT-PCR was used to detect nAChRs subtypes expressed in mESCs and mouse heart. Several nAChRs subtypes including *a1*, *a2*, *a4*, *a6*, *a7*,  $\beta 1$ ,  $\beta 2$ , and  $\beta 3$  were found to express in both mESCs and mouse heart.

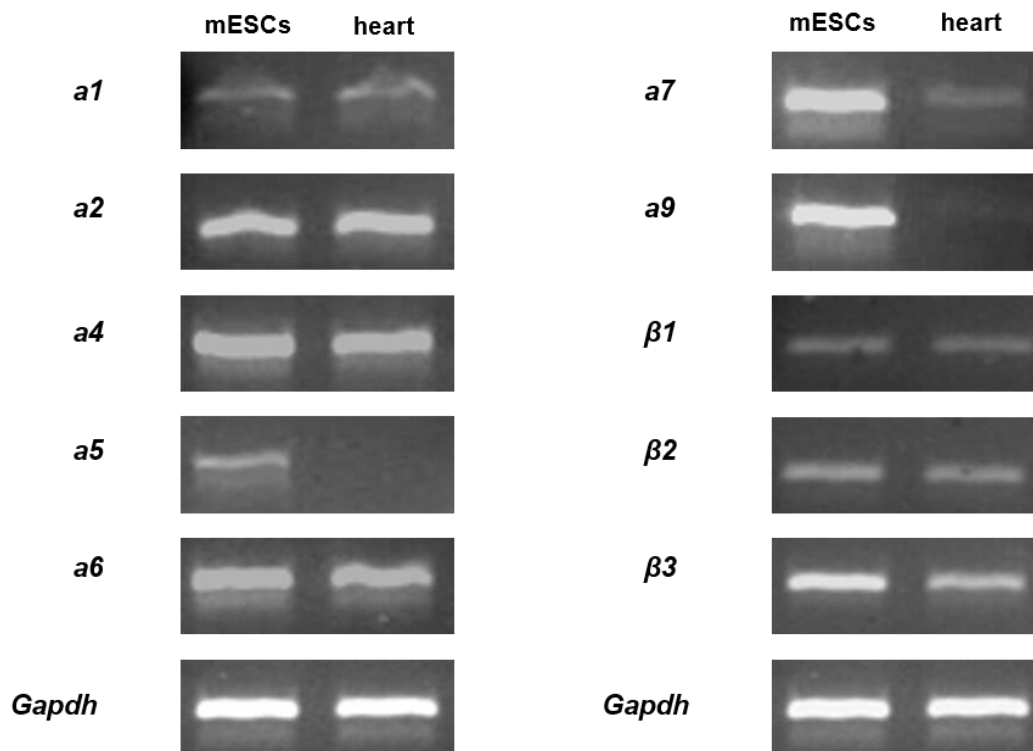

**Figure S2. nAChRs subtypes expressed in mESCs and mouse heart.**

nAChRs subtypes in mESCs and mouse heart were tested by RT-PCR. Three independent experiments.

**Figure S3. The representative images of M-mode echocardiography (Related to Figure 7).**

To determine the effect of nicotine on cardiac function, echocardiography(echo) was performed in the neonates at postnatal Day 1. M-mode echograms from nicotine-exposed groups with or without Hexa exposure showed similar patterns as those from control.

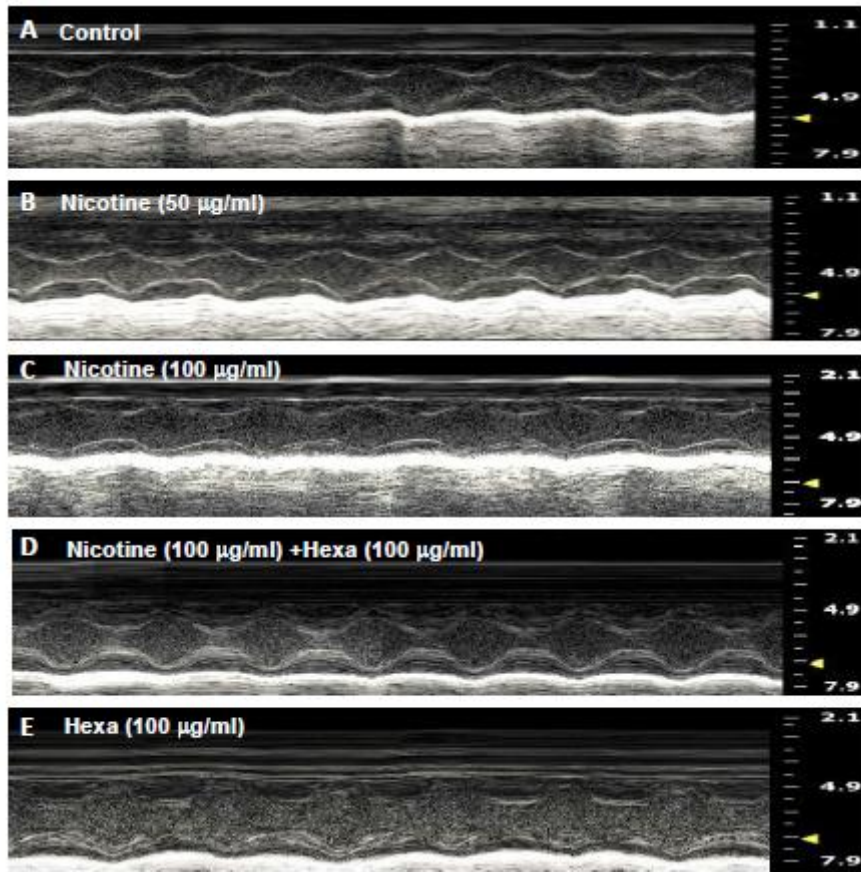

**Figure S3. The representative images of M-mode echocardiography.**

M-mode echocardiography was represented for control (A), 50 µg/ml (B) and 100 µg/ml (C) nicotine-exposed groups, and 100 µg/ml nicotine with 100 µg/ml Hexa (D), 100 µg/ml Hexa (E) treated group respectively.

## Supplemental Tables

**Table S1. The sequences of primer pairs for qPCR of mouse genes (Relative to Figure 1).**

| Gene         | Primer sequence                                                                   | Size (bp) |
|--------------|-----------------------------------------------------------------------------------|-----------|
| <i>Oct4</i>  | Forward 5'-TATGCAAATCGGAGACCCTG-3'<br>Reverse 5'-AAGCTGATTGGCGATGTGAG-3'          | 143       |
| <i>Nanog</i> | Forward 5'-CAGCCCTGATTCTTCTACCAG-3'<br>Reverse 5'-GATGCGTTCACCAGATAGCC-3'         | 384       |
| <i>Tbx5</i>  | Forward 5'-GGAGCCTGATTCCAAAGACA-3'<br>Reverse 5'-TTCAGCCACAGTTCACGTTC-3'          | 153       |
| <i>Gata4</i> | Forward 5'-GTTCCCAGGCCTCTTGCAATGCGG-3'<br>Reverse 5'-AGTGGCATTGCTGGAGTTACCGCTG-3' | 154       |
| <i>Gapdh</i> | Forward 5'-ACCACAGTCCATGCCATCAC-3'<br>Reverse 5'-CATGCCAGTGAGCTTCCCGT-3'          | 168       |

**Table S2. The sequences of primer pairs for qPCR of rat genes (Relative to Figure 5).**

| Gene         | Primer sequence                                                           | Size (bp) |
|--------------|---------------------------------------------------------------------------|-----------|
| <i>Tbx5</i>  | Forward 5'-GGTCCGTAAGTGGTAAAG-3'<br>Reverse 5'-ATTTTCGTCTGCTTTTAC-3'      | 212       |
| <i>Gata4</i> | Forward 5'-TGAGGGCGAGCCTGTTTGCAA-3'<br>Reverse 5'-GCTGGTGGCGTTGCTGGAGT-3' | 205       |
| <i>Gapdh</i> | Forward 5'-CCATGGAGAAGGCTGGGG-3'<br>Reverse 5'-CAAAGTTGTCATGGATGACC-3'    | 195       |

**Table S3. The primer pairs of nAChRs subtypes for RT-PCR of mouse genes.  
(Relative to Figure 1 and Figure S2)**

| Gene         | Primer sequence                                                           | Size (bp) |
|--------------|---------------------------------------------------------------------------|-----------|
| <i>a1</i>    | Forward 5'-TGGAAGCACTGGGTGTTCTA-3'<br>Reverse 5'-AACATATACTTCCCGATCAGG-3' | 287       |
| <i>a2</i>    | Forward 5'-CTTCGGTGAAGGAAGATTGG-3'<br>Reverse 5'-GGAGCCAACATGAGGGACAT-3'  | 155       |
| <i>a4</i>    | Forward 5'-GACTTTGCAGTCACCCACCT-3'<br>Reverse 5'-CGGCTGTGCATGCTCACCAA-3'  | 197       |
| <i>a5</i>    | Forward 5'-TCATGCCGATAGGTACTTC-3'<br>Reverse 5'-ATTGGCCCATTATAAATAA-3'    | 262       |
| <i>a6</i>    | Forward 5'-CTTTGTCACGCTGTCCAT-3'<br>Reverse 5'-GCCTCCTTTGTCTTGTCC-3'      | 159       |
| <i>a7</i>    | Forward 5'-ACAGTACTTCGCCAGCACCA-3'<br>Reverse 5'-AAACCATGCACACCAATTCA-3'  | 145       |
| <i>a9</i>    | Forward 5'-CAATGCTCTGCGTCCAGTAG-3'<br>Reverse 5'-ACACCAGATCGCTGGGAATC-3'  | 209       |
| $\beta 1$    | Forward 5'-TCCTTAGTGTTGTGGTCCTC-3'<br>Reverse 5'-TGTGGTTCAGGGAGTTGGTC-3'  | 151       |
| $\beta 2$    | Forward 5'-GAGTGTGAGGGAGGATTGGA-3'<br>Reverse 5'-TCGTGGCAGTGTAGTTCTGG-3'  | 134       |
| $\beta 3$    | Forward 5'-AACACTGAGCTTAAAAGGAA-3'<br>Reverse 5'-GCGGACACATTTCTGATAAC-3'  | 196       |
| <i>Gapdh</i> | Forward 5'-ACCACAGTCCATGCCATCAC-3'<br>Reverse 5'-CATGCCAGTGAGCTTCCCGT-3'  | 168       |

**Table S4. Echocardiography of offspring hearts at postnatal day 1 (Relative to Figure 7).  
Details in excel file.**

**Supplemental Videos**

**Video of spontaneously beating EBs (Related to Figure 1).**

Spontaneously beating EBs in control (A) and 10  $\mu$ M nicotine-exposed group (B) at day 12 differentiation were recorded. As was shown in the videos, the area, intensity together with frequency of beating EBs were significantly reduced with 10  $\mu$ M nicotine exposure.
